# Supplementary material for: Whole genome analysis and antimicrobial resistance of Neisseria gonorrhoeae isolates from Ghana
Source: Front Microbiol. 2023 Jun 29;14:1163450. doi: 10.3389/fmicb.2023.1163450 (PMC10339232; doi:10.3389/fmicb.2023.1163450)
Supplement: Supplementary file 2 [file Table_2.xlsx]

## Sheet: Genome assembly metrics
	Sequencing and assembly metrics
	Isolate	NCBI Accession	PubMLST Accession	Mean coverage(X)	% GC	No. of contigs	N50	Total length(bp)
	GHA-ADB-055	JAJQRH000000000	95771	329	52.5	9	1112229	2207574
	GHA-ADB-088	JAJQRI000000000	95772	312	52.3	20	792935	2275303
	GHA-ADB-095	JAJQRJ000000000	95773	292	52.3	9	1786740	2216715
	GHA-ADB-099	JAJQRK000000000	95774	333	52.3	12	958708	2275380
	GHA-ADB-129	JAJQRL000000000	95775	310	52.5	11	1515571	2214653
	GHA-ADB-135	JAJQRM000000000	95776	235	52.3	34	278823	2245593
	GHA-ADB-191	JAJQRN000000000	95777	103	52.5	17	333046	2201786
	GHA-ADB-216	JAJQRO000000000	95778	114	52.3	12	848437	2265459
	GHA-ADB-230	JAJQRP000000000	95779	182	52.4	6	2230923	2236134
	GHA-ARM-046	JAJQRQ000000000	95780	211	52.5	14	1577450	2222625
	GHA-ARM-069	JAJQRR000000000	95781	183	52.5	14	421002	2,214, 237
	GHA-ARM-073	JAJQRS000000000	95782	393	52.5	9	1769194	2214512
	GHA-ARM-106	JAJQRT000000000	95783	255	52.3	13	833616	2280616
	GHA-ARM-127	JAJQRU000000000	95784	235	52.5	14	1222219	2220764
	GHA-ARM-163	JAJQRV000000000	95785	109	52.3	24	465065	2267772
	GHA-ARM-165	JAJQRW000000000	95786	266	52.3	17	487380	2269929
	GHA-NAV-029	JAJQRX000000000	95787	201	52.3	14	1156399	2277753
	GHA-NAV-031	JAJQRY000000000	95788	225	52.3	76	230102	2233617
	GHA-NAV-040	JAJQRZ000000000	95789	133	52.5	16	529724	2205744
	GHA-TMH-040	JAJQSA000000000	95790	241	52.4	23	340121	2256696
	GHA-TMH-042	JAJQSB000000000	95791	726	52.5	12	670875	2214314
	GHA-TMH-050	JAJQSC000000000	95792	590	52.5	8	1120053	2210976
	GHA-TMH-067	JAJQSD000000000	95793	222	52.5	15	505602	2220847
	GHA-TMH-068	JAJQSE000000000	95794	139	52.3	37	757403	2266969
	GHA-TMH-074	JAJQSF000000000	95795	245	52.4	9	954207	2220608
	GHA-TMH-455	JAJQSG000000000	95796	249	52.5	19	700031	2213839
	GHA-TMH-458	JAJQSH000000000	95797	159	52.4	10	2171259	2226521
	GHA-TMH-462	JAJQSI000000000	95798	210	52.4	10	1989122	2222325
	GHA-TMH-465	JAJQSJ000000000	95799	341	52.5	12	690900	2225688
	GHA-TMH-484	JAJQSK000000000	95800	138	52.5	17	1518632	2223002
	GHA-TMH-537	JAJQSL000000000	95801	221	52.5	5	2165712	2222888
	GHA-ADB-284	JAJQSM000000000	95802	247	52.5	16	2122374	2218687
	GHA-ADB-297	JAJQSN000000000	95803	216	52.5	25	636304	2222944
	GHA-ADB-340	JAJQSO000000000	95804	282	52.4	49	626218	2261054
	GHA-ADB-342	JAJQSP000000000	95805	166	52.3	8	2200962	2263834
	GHA-ADB-347	JAJQSQ000000000	95806	235	52.5	9	1276959	2219728
	GHA-ADB-348	JAJQSR000000000	95807	185	52.5	6	1396109	2219730
	GHA-ADB-360	JAJQSS000000000	95808	545	52.5	7	1653299	2220265
	GHA-ADB-369	JAJQST000000000	95809	252	52.4	10	1822626	2220384
	GHA-AIR-053	JAJQSU000000000	95810	178	52.5	53	86450	2203783
	GHA-AIR-057	JAJQSV000000000	95811	444	52.5	8	1689775	2211797
	GHA-AIR-058	JAJQSW000000000	95812	167	52.6	10	1510876	2175535
	GHA-ARM-233	JAJQSX000000000	95813	222	52.3	13	1708377	2219129
	GHA-ARM-285	JAJQSY000000000	95814	319	52.3	9	1824036	2220223
	GHA-ARM-288	JAJQSZ000000000	95815	143	52.3	26	271127	2209278
	GHA-ARM-299	JAJQTA000000000	95816	256	52.3	12	1339237	2229308
	GHA-TMH-588	JAJQTB000000000	95817	330	52.3	6	1558418	2210504
	GHA-TMH-594	JAJQTC000000000	95818	582	52.3	11	1390985	2216913
	GHA-TMH-612	JAJQTD000000000	95819	360	52.3	11	1237009	2214109
	GHA-TMH-619	JAJQTE000000000	95820	137	52.3	10	2154662	2209447
	GHA-TMH-624	JAJQTF000000000	95821	272	52.3	12	2163509	2231346
	GHA-TMH-633	JAJQTG000000000	111732	438	52.3	9	2094777	2217716
	GHA-TMH-657	JAJQTH000000000	111733	633	52.3	8	834264	2213755
	GHA-TMH-663	JAJQTI000000000	111734	415	52.3	12	2146728	2220033
	GHA-TMH-679	JAJQTJ000000000	111735	225	52.3	19	1466061	2271993
	GHA-TMH-685	JAJQTK000000000	111736	121	52.3	7	2049046	2205993
